# Supplementary material
Source: PubMed Central journal article supplement (PMC6233648)
Supplement: jamasurg-153-e182009-s001.pdf [file jamasurg-153-e182009-s001.pdf]

## Supplementary Online Content

Wahl TS, Graham LA, Morris MS, et al. Association between preoperative proteinuria and postoperative acute kidney injury and readmission. *JAMA Surg*. Published online July 3, 2018. doi:10.1001/jamasurg.2018.2009

**eFigure.** Study Population

**eTable 1.** Characteristics of Patients Missing Procedure Urinalysis Results compared to Analyzed Procedures

**eTable 2.** Perioperative Medication Administrations Associated with Preoperative Proteinuria and Outcomes

**eTable 3.** Readmission Reason by Preoperative Proteinuria

**eTable 4.** Correlates of Preoperative Proteinuria Ranked by Importance

This supplementary material has been provided by the authors to give readers additional information about their work.

**eFigure.** Study Population

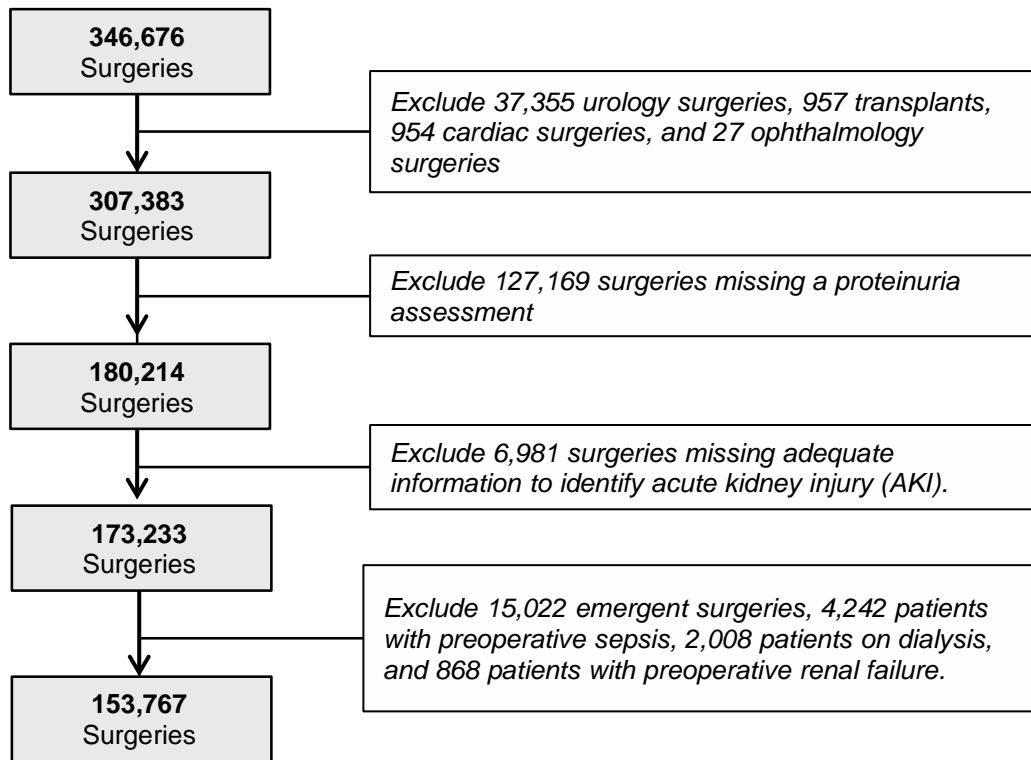

| <b>eTable 1.</b> Characteristics of Patients Missing Procedure Urinalysis Results compared to Analyzed Procedures |                 |                   |                 |                   |                |
|-------------------------------------------------------------------------------------------------------------------|-----------------|-------------------|-----------------|-------------------|----------------|
|                                                                                                                   | <b>Excluded</b> |                   | <b>Analyzed</b> |                   | <b>P-Value</b> |
|                                                                                                                   | <b>N / Mean</b> | <b>(%) / (SD)</b> | <b>N / Mean</b> | <b>(%) / (SD)</b> |                |
| <b>OVERALL</b>                                                                                                    | 114,486         | (42.7)            | 153,767         | (57.3)            |                |
| <i>Outcomes</i>                                                                                                   |                 |                   |                 |                   |                |
| Acute Kidney Injury, Cr increase of 0.3mg/dl, n (%)                                                               | 11,032          | (9.6)             | 17,209          | (11.2)            | <.001          |
| Any 30-Day Unplanned Readmission, n (%)                                                                           | 10,904          | (9.5)             | 16,665          | (10.8)            | <.001          |
| <i>Demographics and Prior Healthcare Utilization</i>                                                              |                 |                   |                 |                   |                |
| Age                                                                                                               | 62.6            | (11.3)            | 63.7            | (11.3)            | <.001          |
| Male Gender, n (%)                                                                                                | 105,699         | (92.3)            | 143,288         | (93.2)            | <.001          |
| Race, n (%)                                                                                                       |                 |                   |                 |                   | <.001          |
| White                                                                                                             | 89,524          | (81.1)            | 118,761         | (80.6)            |                |
| Black                                                                                                             | 18,895          | (17.1)            | 25,730          | (17.5)            |                |
| Other                                                                                                             | 1,921           | (1.7)             | 2,850           | (1.9)             |                |
| BMI                                                                                                               | 28.8            | (6.7)             | 28.9            | (14.6)            | 0.78           |
| Marital Status, n (%)                                                                                             |                 |                   |                 |                   | <.001          |
| Single                                                                                                            | 12,102          | (10.6)            | 15,907          | (10.4)            |                |
| Married                                                                                                           | 54,023          | (47.3)            | 71,712          | (46.7)            |                |
| Divorced/Separated/Widowed                                                                                        | 48,204          | (42.2)            | 66,038          | (43.0)            |                |
| Functional Health Status, n (%)                                                                                   |                 |                   |                 |                   | <.001          |
| Independent                                                                                                       | 106,805         | (93.3)            | 139,469         | (90.7)            |                |
| Partially Dependent                                                                                               | 6,863           | (6.0)             | 12,155          | (7.9)             |                |
| Totally Dependent                                                                                                 | 790             | (0.7)             | 2,103           | (1.4)             |                |
| Number of Prior ER Visits within 6 Months                                                                         | 0.6             | (1.3)             | 1.0             | (1.9)             | <.001          |
| Number of Prior Inpatient Admissions within 6 Months                                                              | 0.5             | (1.6)             | 0.90            | (2.3)             | <.001          |
| <i>Preoperative Comorbidities</i>                                                                                 |                 |                   |                 |                   |                |
| Chronic Kidney Disease                                                                                            | 2,604           | (2.3)             | 6,962           | (4.5)             | <.001          |
| ASA Classification, n (%)                                                                                         |                 |                   |                 |                   | <.001          |
| 1-2                                                                                                               | 22,962          | (20.1)            | 27,280          | (17.8)            |                |
| 3                                                                                                                 | 81,582          | (71.3)            | 107,623         | (70.0)            |                |
| 4-5                                                                                                               | 9,917           | (9.0)             | 18,824          | (12.0)            |                |
| Bleeding Disorders, n (%)                                                                                         | 6,854           | (6.0)             | 9,205           | (6.0)             | 1.00           |
| Diabetes Mellitus With Oral Agents Or Insulin, n (%)                                                              |                 |                   |                 |                   | <.001          |
| None                                                                                                              | 89,071          | (77.8)            | 112,066         | (72.9)            |                |
| Oral                                                                                                              | 15,339          | (13.4)            | 22,798          | (14.8)            |                |
| Insulin                                                                                                           | 10,076          | (8.8)             | 18,903          | (12.3)            |                |
| Dyspnea, n (%)                                                                                                    |                 |                   |                 |                   | <.001          |
| No Dyspnea                                                                                                        | 99,655          | (87.1)            | 132,889         | (86.4)            |                |
| Minimal Exertion                                                                                                  | 13,825          | (12.1)            | 19,318          | (12.6)            |                |
| At Rest                                                                                                           | 1,005           | (0.9)             | 1,558           | (1.0)             |                |
| DNR Status, n (%)                                                                                                 | 934             | (0.8)             | 2,406           | (1.6)             | <.001          |
| Etoh > 2 Drinks/Day, n (%)                                                                                        | 9,279           | (8.1)             | 12,440          | (8.1)             | 0.89           |
| Hemiplegia, n (%)                                                                                                 | 2,516           | (2.2)             | 3,862           | (2.5)             | <.001          |
| Congestive Heart Failure, n (%)                                                                                   | 583             | (0.5)             | 1,336           | (0.9)             | <.001          |
| History of Transient Ischemic Attacks, n (%)                                                                      | 4,092           | (3.6)             | 5,845           | (3.8)             | 0.002          |
| Current Smoker Within One Year, n (%)                                                                             | 41,096          | (35.9)            | 51,385          | (33.4)            | <.001          |
| Steroid Use For Chronic Condition, n (%)                                                                          | 2,191           | (1.9)             | 3,822           | (2.5)             | <.001          |
| Hypertension Requiring Medication, n (%)                                                                          | 76,787          | (67.1)            | 108,289         | (70.4)            | <.001          |
| History of MI, n (%)                                                                                              | 359             | (0.3)             | 834             | (0.5)             | <.001          |
| History of Revascularization/Amputation for                                                                       | 8,112           | (7.1)             | 12,394          | (8.1)             | <.001          |

|                                 |        |       |        |       |       |
|---------------------------------|--------|-------|--------|-------|-------|
| PVD, n (%)                      |        |       |        |       |       |
| Previous PTCA Procedure, n (%)  | 10,112 | (8.8) | 14,117 | (9.2) | 0.002 |
| Previous Cardiac Surgery, n (%) | 9,350  | (8.2) | 14,386 | (9.4) | <.001 |

N=114,486 reflects procedures missing pre-operative urinalysis, excluding inadequate information to identify acute kidney injury, emergent surgeries, pre-operative sepsis, pre-operative dialysis and renal failure. SD = Standard Deviation; BMI = Body Mass Index; ED = Emergency Department; ASA = American Society of Anesthesiologists; DNR = Do Not Resuscitate; MI = Myocardial Infarction; PVD = Peripheral Vascular Disease; PTCA = Percutaneous Transluminal Coronary Angioplasty

| <b>eTable 2. Perioperative Medication Administrations Associated with Preoperative Proteinuria and Outcomes</b> |               |                |        |               |               |               |              |              |         |                     |         |                       |         |
|-----------------------------------------------------------------------------------------------------------------|---------------|----------------|--------|---------------|---------------|---------------|--------------|--------------|---------|---------------------|---------|-----------------------|---------|
|                                                                                                                 |               | Overall        |        | Negative      | Trace         | 1+            | 2+           | 3+           | p-value | Acute Kidney Injury |         | Unplanned Readmission |         |
|                                                                                                                 |               | N              | (%)    | %             | %             | %             | %            | %            |         | %                   | p-value | %                     | p-value |
| <b>Overall N / %</b>                                                                                            |               | <b>153,767</b> |        | <b>86,571</b> | <b>31,676</b> | <b>24,603</b> | <b>8,457</b> | <b>2,460</b> |         | <b>11.2%</b>        |         | <b>10.8%</b>          |         |
| Antibiotics, n (%)                                                                                              |               |                |        |               |               |               |              |              |         |                     |         |                       |         |
|                                                                                                                 | Pre-Admission | 33,309         | (22.0) | 20.4          | 24.1          | 24.4          | 24.2         | 22.8         | <.001   | 12.5                | <0.01   | 11.8                  | <0.01   |
|                                                                                                                 | Pre-Op        | 11,261         | (7.5)  | 5.5           | 8.0           | 11.6          | 12.4         | 11.3         | <.001   | 13.4                | <0.01   | 15.1                  | <0.01   |
|                                                                                                                 | Post-Op       | 545            | (0.4)  | 0.4           | 0.4           | 0.4           | 0.3          | 0.1          | 0.08    | 14.1                | 0.04    | 13.2                  | 0.08    |
| Anti-inflammatory (NSAID) n (%)                                                                                 |               |                |        |               |               |               |              |              |         |                     |         |                       |         |
|                                                                                                                 | Pre-Admission | 8,272          | (5.5)  | 6.4           | 5.1           | 4.1           | 3.0          | 1.8          | <.001   | 6.4                 | <0.01   | 8.8                   | <0.01   |
|                                                                                                                 | Pre-Op        | 1,040          | (0.7)  | 0.6           | 0.8           | 0.8           | 0.7          | 0.3          | 0.003   | 8.8                 | 0.01    | 14.1                  | <0.01   |
|                                                                                                                 | Post-Op       | 529            | (0.4)  | 0.4           | 0.3           | 0.2           | 0.2          | 0.1          | <.001   | 7.4                 | <0.01   | 8.5                   | 0.08    |
| Anti-hypertensive, n (%)                                                                                        |               |                |        |               |               |               |              |              |         |                     |         |                       |         |
|                                                                                                                 | Pre-Admission | 29,188         | (19.3) | 18.2          | 19.0          | 20.5          | 24.6         | 31.2         | <.001   | 13.2                | <0.01   | 10.7                  | 0.32    |
|                                                                                                                 | Pre-Op        | 7,600          | (5.0)  | 3.4           | 6.1           | 7.4           | 9.5          | 11.9         | <.001   | 16.7                | <0.01   | 15.5                  | <0.01   |
|                                                                                                                 | Post-Op       | 1,331          | (0.9)  | 0.9           | 0.8           | 0.9           | 1.0          | 1.4          | 0.02    | 9.5                 | 0.04    | 10.9                  | 1.00    |
| Diuretic, n (%)                                                                                                 |               |                |        |               |               |               |              |              |         |                     |         |                       |         |
|                                                                                                                 | Pre-Admission | 10,553         | (7.0)  | 7.3           | 6.8           | 6.4           | 6.2          | 6.8          | <.001   | 10.3                | <0.01   | 9.7                   | <0.01   |
|                                                                                                                 | Pre-Op        | 1,844          | (1.2)  | 0.9           | 1.6           | 1.5           | 2.0          | 1.7          | <.001   | 14.4                | <0.01   | 14.8                  | <0.01   |
|                                                                                                                 | Post-Op       | 401            | (0.3)  | 0.3           | 0.2           | 0.2           | 0.2          | 0.3          | 0.29    | 7.0                 | 0.01    | 9.0                   | 0.22    |
| Contrast, n (%)                                                                                                 |               |                |        |               |               |               |              |              |         |                     |         |                       |         |
|                                                                                                                 | Pre-Admission | 94             | (0.1)  | 0.1           | 0.1           | 0.1           | 0.1          | 0.1          | 0.02    | 17.0                | 0.08    | 18.1                  | 0.03    |
|                                                                                                                 | Pre-Op        | 229            | (0.2)  | 0.1           | 0.2           | 0.3           | 0.3          | 0.1          | <.001   | 19.7                | <0.01   | 15.7                  | 0.02    |
|                                                                                                                 | Post-Op       | 5              | (0.0)  | 0.0           | 0.0           | 0.0           | 0.0          | 0.0          | 0.38    | 20.0                | 0.54    | 20.0                  | 0.51    |
| Vasopressors, n (%)                                                                                             |               |                |        |               |               |               |              |              |         |                     |         |                       |         |
|                                                                                                                 | Pre-Admission | 233            | (0.2)  | 0.2           | 0.1           | 0.2           | 0.1          | 0.1          | 0.02    | 8.6                 | 0.19    | 12.0                  | 0.58    |
|                                                                                                                 | Pre-Op        | 26             | (0.0)  | 0.0           | 0.0           | 0.1           | 0.0          | 0.0          | 0.01    | 23.1                | 0.06    | 19.2                  | 0.17    |
|                                                                                                                 | Post-Op       | 6              | (0.0)  | 0.0           | 0.0           | 0.0           | 0.0          | 0.0          | 0.06    | 16.7                | 0.68    | 0.0                   | 0.39    |
| Blood Derivatives, n (%)                                                                                        |               |                |        |               |               |               |              |              |         |                     |         |                       |         |
|                                                                                                                 | Pre-Admission | 124            | (0.1)  | 0.1           | 0.1           | 0.1           | 0.1          | 0.1          | 0.29    | 18.6                | 0.01    | 18.6                  | 0.01    |
|                                                                                                                 | Pre-Op        | 29             | (0.0)  | 0.0           | 0.0           | 0.0           | 0.0          | 0.0          | 0.58    | 13.8                | 0.67    | 34.5                  | <0.01   |
|                                                                                                                 | Post-Op       | 29             | (0.0)  | 0.0           | 0.0           | 0.0           | 0.0          | 0.0          | 0.83    | 20.7                | 0.11    | 20.7                  | 0.09    |
| IV Fluid, n (%)                                                                                                 |               |                |        |               |               |               |              |              |         |                     |         |                       |         |
|                                                                                                                 | Pre-Admission | 35,924         | (23.8) | 23.9          | 23.8          | 24.3          | 22.0         | 20.2         | <.001   | 10.3                | <0.01   | 11.3                  | 0.003   |
|                                                                                                                 | Pre-Op        | 14,109         | (9.3)  | 7.1           | 10.1          | 13.6          | 15.1         | 14.5         | <.001   | 13.5                | <0.01   | 15.2                  | <0.01   |
|                                                                                                                 | Post-Op       | 2,921          | (1.9)  | 1.9           | 2.0           | 2.1           | 1.7          | 1.4          | 0.12    | 11.9                | 0.27    | 12.2                  | 0.03    |
| TPN, n (%)                                                                                                      |               |                |        |               |               |               |              |              |         |                     |         |                       |         |
|                                                                                                                 | Pre-Admission | 267            | (0.2)  | 0.1           | 0.2           | 0.3           | 0.4          | 0.1          | <.001   | 18.7                | <0.01   | 19.5                  | <0.01   |
|                                                                                                                 | Pre-Op        | 66             | (0.0)  | 0.0           | 0.0           | 0.1           | 0.1          | 0.0          | 0.18    | 7.6                 | 0.34    | 22.7                  | <0.01   |
|                                                                                                                 | Post-Op       | 8              | (0.0)  | 0.0           | 0.0           | 0.0           | 0.0          | 0.0          | 0.91    | 0.0                 | 0.31    | 12.5                  | 0.88    |

IV = Intravenous; TPN = Total Parenteral Nutrition

| <b>eTable 3. Readmission Reason by Preoperative Proteinuria</b> |                |                    |              |              |              |              |                 |
|-----------------------------------------------------------------|----------------|--------------------|--------------|--------------|--------------|--------------|-----------------|
| <i>N</i> = 16,665                                               | <b>Overall</b> | <b>Proteinuria</b> |              |              |              |              | <b>P-Value</b>  |
|                                                                 |                | <b>Negative</b>    | <b>Trace</b> | <b>1+</b>    | <b>2+</b>    | <b>3+</b>    |                 |
| <b>Wound-Related Codes</b>                                      |                |                    |              |              |              |              |                 |
| <b>Any</b>                                                      | <b>22.9%</b>   | <b>23.9%</b>       | <b>22.7%</b> | <b>21.3%</b> | <b>21.6%</b> | <b>23.9%</b> | <b>0.03</b>     |
| Postoperative Abscess/Septicemia                                | 12.3%          | 13.4%              | 12.4%        | 10.3%        | 10.7%        | 10.5%        | <0.01           |
| Acute Abscess / Diffuse Cellulitis / Lymphangitis               | 7.5%           | 8.1%               | 7.0%         | 6.9%         | 6.1%         | 7.3%         | 0.04            |
| Wound Disruption/Dehiscence/Rupture                             | 6.2%           | 6.2%               | 6.6%         | 5.8%         | 5.7%         | 6.1%         | 0.60            |
| Amputation Stump Infection                                      | 1.4%           | 1.0%               | 1.5%         | 1.8%         | 2.5%         | 2.4%         | <0.01           |
| Amputation Stump Non-infectious Complication                    | 0.7%           | 0.6%               | 0.6%         | 0.9%         | 0.9%         | 2.2%         | <0.01           |
| Infected postoperative seroma                                   | 0.6%           | 0.7%               | 0.5%         | 0.3%         | 0.5%         | 0.5%         | 0.10            |
| Peritoneal Abscess                                              | 1.5%           | 1.5%               | 1.2%         | 2.0%         | 1.5%         | 1.2%         | 0.10            |
| Injury - Posttraumatic Wound Infection                          | 0.2%           | 0.2%               | 0.3%         | 0.1%         | 0.3%         | 0.0%         | 0.35            |
| <b>Gastrointestinal-Related Codes</b>                           |                |                    |              |              |              |              |                 |
| <b>Any</b>                                                      | <b>14.8%</b>   | <b>15.2%</b>       | <b>14.3%</b> | <b>15.2%</b> | <b>13.4%</b> | <b>12.7%</b> | <b>0.20</b>     |
| Intestinal Obstruction                                          | 6.5%           | 6.8%               | 6.4%         | 6.5%         | 5.1%         | 4.4%         | 0.09            |
| Constipation                                                    | 4.0%           | 4.2%               | 3.9%         | 3.6%         | 3.9%         | 3.4%         | 0.58            |
| Nausea                                                          | 3.4%           | 3.5%               | 2.9%         | 3.6%         | 3.1%         | 2.9%         | 0.41            |
| Vomiting                                                        | 3.0%           | 3.0%               | 2.5%         | 3.5%         | 3.0%         | 2.9%         | 0.22            |
| Ostomy Care / Complications                                     | 0.9%           | 0.9%               | 0.8%         | 1.3%         | 0.5%         | 1.5%         | 0.04            |
| Acute Pancreatitis                                              | 0.9%           | 0.8%               | 0.9%         | 1.0%         | 1.1%         | 1.5%         | 0.63            |
| Ulcers or Gastritis                                             | 0.8%           | 0.7%               | 1.0%         | 0.8%         | 0.9%         | 0.2%         | 0.40            |
| Gastroenteritis                                                 | 0.2%           | 0.2%               | 0.0%         | 0.3%         | 0.2%         | 0.0%         | 0.05            |
| Diverticulosis                                                  | 0.1%           | 0.1%               | 0.0%         | 0.1%         | 0.1%         | 0.2%         | 0.60            |
| Diverticulitis                                                  | 0.0%           | 0.0%               | 0.1%         | 0.0%         | 0.0%         | 0.0%         | 0.66            |
| <b>Device Complications</b>                                     |                |                    |              |              |              |              |                 |
| <b>Any</b>                                                      | <b>7.6%</b>    | <b>8.4%</b>        | <b>7.8%</b>  | <b>6.8%</b>  | <b>4.6%</b>  | <b>4.2%</b>  | <b>&lt;0.01</b> |
| Other Device Complications                                      | 7.4%           | 8.2%               | 7.5%         | 6.6%         | 4.3%         | 4.2%         | <0.01           |
| Catheter-related bloodstream infection                          | 0.2%           | 0.2%               | 0.4%         | 0.2%         | 0.3%         | 0.0%         | 0.31            |
| Catheter-Associated Urinary Tract Infection                     | 0.3%           | 0.2%               | 0.3%         | 0.4%         | 0.3%         | 0.2%         | 0.29            |
| <b>Renal Failure and Electrolyte Disorders</b>                  |                |                    |              |              |              |              |                 |
| <b>Any</b>                                                      | <b>22.1%</b>   | <b>19.9%</b>       | <b>21.0%</b> | <b>25.9%</b> | <b>27.3%</b> | <b>28.1%</b> | <b>&lt;0.01</b> |
| Other Fluid and Electrolyte Disorders                           | 16.8%          | 15.7%              | 16.1%        | 19.7%        | 18.5%        | 18.3%        | <0.01           |
| Acute Renal Failure                                             | 10.6%          | 8.5%               | 10.5%        | 13.5%        | 14.8%        | 18.3%        | <0.01           |
| Dehydration                                                     | 7.5%           | 6.9%               | 7.8%         | 9.0%         | 7.2%         | 5.9%         | <0.01           |
| <b>Mental Health Codes</b>                                      |                |                    |              |              |              |              |                 |
| <b>Any</b>                                                      | <b>22.2%</b>   | <b>22.4%</b>       | <b>23.5%</b> | <b>21.3%</b> | <b>20.3%</b> | <b>18.1%</b> | <b>0.02</b>     |
| Other Mental Health Disorders                                   | 14.7%          | 14.6%              | 15.9%        | 14.6%        | 13.2%        | 10.7%        | 0.02            |
| Delirium and Other Psychoses                                    | 8.1%           | 7.2%               | 8.6%         | 9.9%         | 7.7%         | 7.1%         | <0.01           |
| Alteration of Consciousness                                     | 5.8%           | 6.1%               | 6.2%         | 4.9%         | 5.2%         | 5.6%         | 0.07            |
| Alcoholism                                                      | 3.7%           | 3.8%               | 4.1%         | 3.6%         | 2.5%         | 3.7%         | 0.12            |
| Substance Abuse                                                 | 2.1%           | 2.2%               | 2.2%         | 1.9%         | 2.1%         | 0.2%         | 0.09            |

| <b>Bleeding</b>                                          |              |              |              |              |              |              |             |
|----------------------------------------------------------|--------------|--------------|--------------|--------------|--------------|--------------|-------------|
| <b>Any</b>                                               | <b>19.7%</b> | <b>19.2%</b> | <b>19.8%</b> | <b>19.8%</b> | <b>21.6%</b> | <b>24.6%</b> | <b>0.03</b> |
| Hemorrhage or Hematoma                                   | 7.6%         | 7.7%         | 7.7%         | 7.2%         | 7.7%         | 6.8%         | 0.89        |
| Hematuria                                                | 1.0%         | 0.8%         | 1.0%         | 1.2%         | 1.5%         | 1.2%         | 0.11        |
| Anemia                                                   | 14.6%        | 14.0%        | 14.5%        | 14.8%        | 16.0%        | 20.5%        | <0.01       |
| <b>Other</b>                                             |              |              |              |              |              |              |             |
| Pain-related                                             | 14.0%        | 15.5%        | 13.6%        | 12.5%        | 10.8%        | 10.0%        | <0.01       |
| Cardiac Arrhythmia                                       | 9.1%         | 7.9%         | 9.3%         | 10.2%        | 12.1%        | 11.2%        | <0.01       |
| Urinary Tract Infection                                  | 7.3%         | 6.0%         | 7.5%         | 8.8%         | 10.6%        | 9.5%         | <0.01       |
| Congestive Heart Failure                                 | 7.0%         | 5.2%         | 6.2%         | 8.9%         | 13.4%        | 12.4%        | <0.01       |
| Peripheral Vascular Disease                              | 6.9%         | 6.3%         | 6.8%         | 7.7%         | 8.7%         | 10.0%        | <0.01       |
| Bacterial Pneumonia                                      | 6.6%         | 6.0%         | 6.3%         | 8.3%         | 7.2%         | 6.1%         | <0.01       |
| Postoperative Sepsis                                     | 4.6%         | 4.1%         | 4.8%         | 5.4%         | 4.5%         | 5.1%         | 0.03        |
| Cardiac Complications & Chest Pain                       | 4.3%         | 4.2%         | 4.2%         | 4.5%         | 4.2%         | 5.9%         | 0.52        |
| Postoperative Pulmonary Embolism or Deep Vein Thrombosis | 4.0%         | 4.5%         | 3.8%         | 3.6%         | 3.3%         | 2.7%         | 0.04        |
| C-Difficile Infection                                    | 2.1%         | 1.8%         | 2.1%         | 2.6%         | 3.1%         | 1.5%         | 0.01        |
| Seizures                                                 | 1.8%         | 1.7%         | 2.0%         | 1.8%         | 1.9%         | 1.5%         | 0.84        |
| Strokes                                                  | 1.3%         | 1.3%         | 1.3%         | 1.5%         | 1.5%         | 1.0%         | 0.77        |
| Injury - Fracture                                        | 1.1%         | 1.1%         | 1.0%         | 1.0%         | 1.3%         | 1.0%         | 0.94        |
| Injury - Dislocation                                     | 0.4%         | 0.4%         | 0.3%         | 0.3%         | 0.3%         | 0.0%         | 0.43        |
| Injury - Open Wound                                      | 0.6%         | 0.7%         | 0.6%         | 0.4%         | 0.6%         | 0.0%         | 0.34        |
| Injury - Poisoning/Overdose                              | 0.5%         | 0.5%         | 0.7%         | 0.4%         | 0.5%         | 0.2%         | 0.48        |
| Injury - Other Non-Surgical Injury                       | 0.4%         | 0.4%         | 0.5%         | 0.3%         | 0.5%         | 0.7%         | 0.63        |

**eTable 4.** Correlates of Preoperative Proteinuria Ranked by Importance

| Any Proteinuria                    |                    |      |         | Proteinuria of 1+ OR more            |                    |      |         |
|------------------------------------|--------------------|------|---------|--------------------------------------|--------------------|------|---------|
| Effect                             | X <sup>2</sup> -df | Rank | p-value | Effect                               | X <sup>2</sup> -df | Rank | p-value |
| Diabetes Mellitus                  | 1,627.7            | 1    | <0.01   | Diabetes Mellitus                    | 2,092.1            | 1    | <0.01   |
| Race                               | 1,031.2            | 2    | <0.01   | Chronic Kidney Disease               | 1,222.5            | 2    | <0.01   |
| Chronic Kidney Disease             | 789.0              | 3    | <0.01   | ASA Classification                   | 648.0              | 3    | <0.01   |
| Functional Status                  | 775.4              | 4    | <0.01   | Race                                 | 471.2              | 4    | <0.01   |
| ASA Classification                 | 532.0              | 5    | <0.01   | Functional Status                    | 337.6              | 5    | <0.01   |
| Prior ED Visits                    | 312.1              | 6    | <0.01   | Prior ED Visits                      | 294.6              | 6    | <0.01   |
| Bleeding Disorders                 | 108.2              | 7    | <0.01   | Age                                  | 103.0              | 7    | <0.01   |
| Age                                | 99.6               | 8    | <0.01   | Body Mass Index                      | 79.1               | 8    | <0.01   |
| Prior Inpatient Admissions         | 88.3               | 9    | <0.01   | Current Smoker within 1 Year         | 53.2               | 9    | <0.01   |
| Body Mass Index                    | 76.7               | 10   | <0.01   | Bleeding Disorders                   | 32.4               | 10   | <0.01   |
| Hypertension Requiring Medications | 60.4               | 11   | <0.01   | Current Pneumonia                    | 31.9               | 11   | <0.01   |
| Disseminated Cancer                | 46.1               | 12   | <0.01   | History of CHF                       | 31.7               | 12   | <0.01   |
| History of COPD                    | 43.1               | 13   | <0.01   | Hypertension Requiring Medications   | 28.9               | 13   | <0.01   |
| Current Smoker within 1 Year       | 37.5               | 14   | <0.01   | Disseminated Cancer                  | 26.0               | 14   | <0.01   |
| Current Pneumonia                  | 33.0               | 15   | <0.01   | Prior Inpatient Admissions           | 21.9               | 15   | <0.01   |
| History of CHF                     | 30.6               | 16   | <0.01   | Chemotherapy for Malignancy          | 21.3               | 16   | <0.01   |
| Chemotherapy for Malignancy        | 27.2               | 17   | <0.01   | Gender                               | 14.3               | 17   | <0.01   |
| Ascites                            | 18.9               | 18   | <0.01   | Ascites                              | 13.7               | 18   | <0.01   |
| Previous Cardiac Surgery           | 17.9               | 19   | <0.01   | Previous PTCA Procedure              | 11.2               | 19   | <0.01   |
| Impaired Sensorium                 | 13.2               | 20   | <0.01   | Hemiplegia                           | 11.2               | 20   | <0.01   |
| Dyspnea                            | 9.0                | 21   | <0.01   | History of COPD                      | 9.2                | 21   | <0.01   |
| Previous PTCA Procedure            | 7.8                | 22   | <0.01   | Esophageal Varices                   | 8.3                | 22   | <0.01   |
| Esophageal Varices                 | 7.2                | 23   | <0.01   | DNR Status                           | 7.7                | 23   | <0.01   |
| History of Bipolar Disorder        | 5.1                | 24   | 0.01    | History of Depression                | 6.8                | 24   | 0.01    |
|                                    |                    |      |         | History of Revascularization for PVD | 6.7                | 25   | 0.01    |
|                                    |                    |      |         | History of Bipolar Disorder          | 6.7                | 26   | 0.01    |
|                                    |                    |      |         | Dyspnea                              | 4.5                | 27   | 0.04    |
|                                    |                    |      |         | Previous Cardiac Surgery             | 4.1                | 28   | 0.02    |
|                                    |                    |      |         | History of MI within 6 Months        | 3.5                | 29   | 0.03    |
|                                    |                    |      |         | Impaired Sensorium                   | 2.9                | 30   | 0.05    |

df = degrees of freedom; ASA = American Society of Anesthesiology; ED = Emergency Department; CHF = Congestive Heart Failure; COPD = Chronic Obstructive Pulmonary Disease; DNR = Do Not Resuscitate; MI = Myocardial Infarction; PVD = Peripheral Vascular Disease; PTCA = Percutaneous Transluminal Coronary Angioplasty

P-values represent Type 3 p-value for the term in the multivariate model
